# Supplementary material for: Skin-Replaceable Antifouling Cellulose Ceramic Membranes from Jute Agro-Waste for Sustainable and Efficient Oily Wastewater Treatment
Source: Research Square preprint supplement (doi:10.21203/rs.3.rs-7765159/v1), 2025-10-27
Supplement: Supplementary file 1 [file 19a1768823be79ab41fb14f6.docx]

**Supplementary materials**

**Skin-Replaceable Antifouling Cellulose Ceramic Membranes from Jute Agro-Waste for Sustainable and Efficient Oily Wastewater Treatment**

Nadeem Baig *[a], Tauqir Ahmad,[a] Ali Sufyan,[b] Muhammad Bilal Asif [c], Kawthar Alqudaihi,[d] Balqees Alrwaily,[d] Md. Sabbir Ahmed,[e] Md. Maniruzzaman,[e] Arshad Hussain,[f] Syed Shaheen Shah,[g], J. Andreas Larsson*[h,i], and Md. Abdul Aziz,*[f]

[a] Interdisciplinary Research Centre for Membranes and Water Security, King Fahd University of Petroleum and Minerals, Dhahran 31261, Saudi Arabia

[b] NanoLund and Division of Mathematical Physics, Department of Physics, Lund University, Lund, Sweden

[c] Department for Civil, Maritime and Environmental Engineering Faculty of Engineering and Physical Sciences, University of Southampton, UK

[d] Chemistry Department, College of Science, Imam Abdulrahman Bin Faisal University (IAU), Dammam, Saudi Arabia.

[e] Department of Chemistry, Khulna University of Engineering & Technology, Khulna 9203, Bangladesh

[f] Interdisciplinary Research Center for Hydrogen Technologies and Carbon Management (IRC-HTCM), King Fahd University of Petroleum & Minerals (KFUPM), Dhahran, 31261 Saudi Arabia

[g] Socio-Environmental Energy Science Department, Graduate School of Energy Science, Kyoto University, Yoshida Honmachi, Sakyo-ku, Kyoto 606-8501, Japan

[h] Applied Physics, Division of Materials Science, Department of Engineering Sciences and Mathematics, Luleå University of Technology, Luleå, SE-97187, Sweden.

[i] Wallenberg Initiative Materials Science for Sustainability, Luleå University of Technology, Luleå SE-97187, Sweden

* Corresponding Authors

Email Addresses: [nadeembaig@kfupm.edu.sa](mailto:nadeembaig@kfupm.edu.sa) (N. Baig); [andreas.1.larsson@ltu.se](mailto:andreas.1.larsson@ltu.se) (J. A. Larsson) and [maziz@kfupm.edu.sa](mailto:maziz@kfupm.edu.sa) (M. A. Aziz)

**
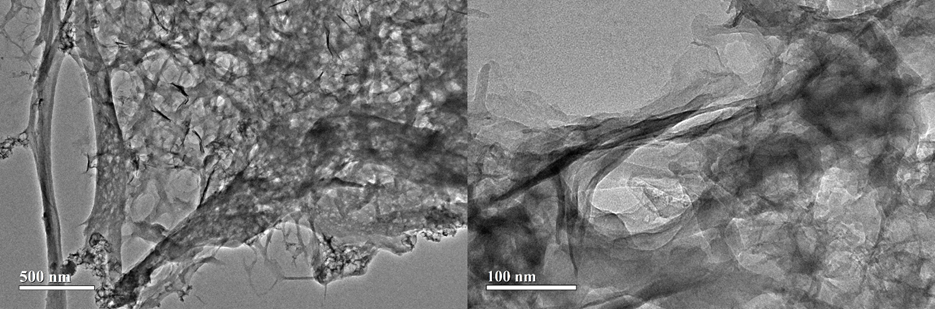
**

**Figure S1.** TEM images of the cellulose dispersion reveal sheet-like and fiber-like structures.


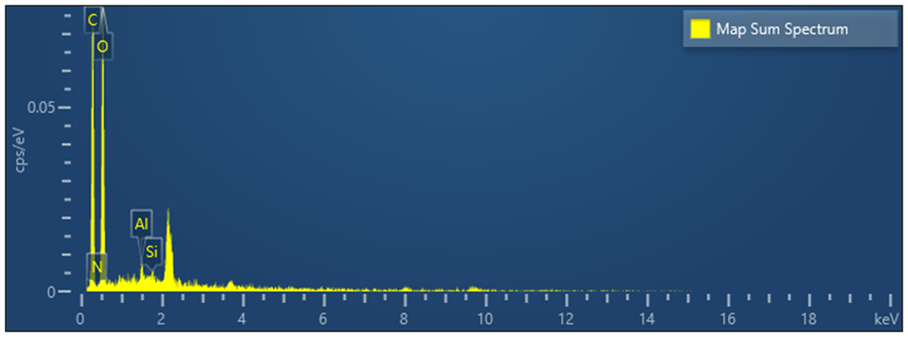


**Figure S2.** EDX analysis of the SRC-M membranes.


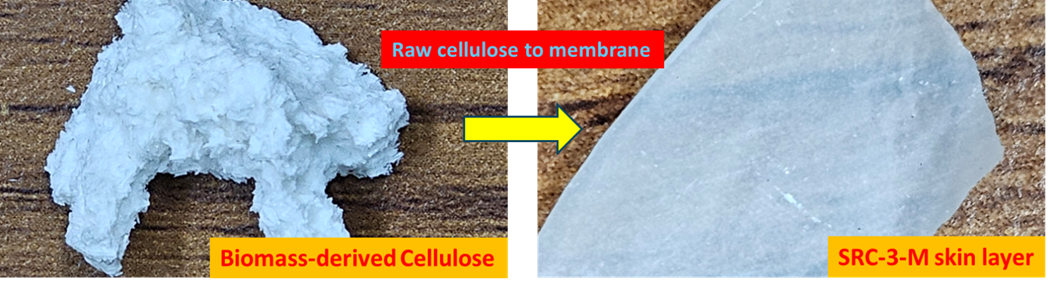


**Figure S3.** Photographs of the SRC-3-M skin layer, which is formed from the biomass-derived cellulose.


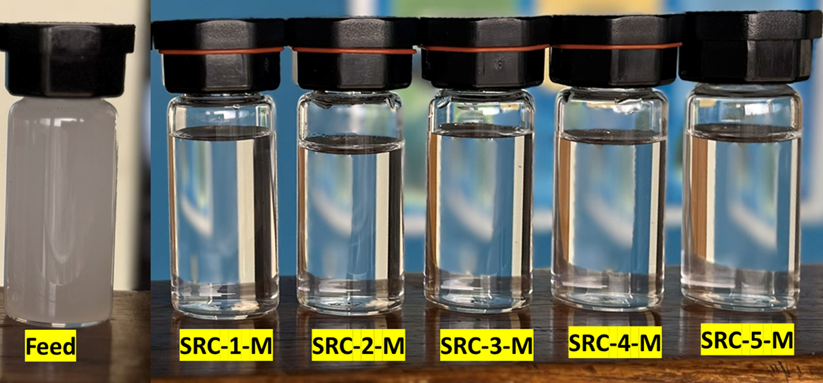


**Figure S4.** The camera captured images of the feed and the permeate collected from different membranes.

**Table S1.** Comparison of the SRC-3-M membranes with other membranes for the separation of the oil-in-water emulsion.

| Membrane | Type of emulsion | Permeability (LMH/bar) | Rejection (%) | FRR (%) | Skin replaceability | Ref. |
| --- | --- | --- | --- | --- | --- | --- |
| SRC-3-M | Oil-in-water emulsion | 487 | 98 | 99 | Yes | **This work** |
| PVDF + PEG | Oil-in-water emulsion | 5 | 99 | 54 | No | [S1] |
| PVDF+ AP | Oil-in-water emulsion | 16.5 | 99 | 99 | No | [S1] |
| PSf/NMP/PVP | Oil-in-water emulsion | 120 | 97.8 | 98 | NO | [S2] |
| PSf/DMAc/PVP (M6) | Oil-in-water emulsion | 50 | 97.2 | 98 | NO | [S2] |
| PSf/NMP/PEG | Oil-in-water emulsion | 90 | 97.1 | 98 | NO | [S2] |
| PSf/DMAc/PEG | Oil-in-water emulsion | 120 | 95.5 | 98 | NO | [S2] |
| GO/PDA/MCEM | Oil-in-water emulsion | ~90 | 96 | 63 | NO | [S3] |
| PZGS-M2-PVDF | Oil-in-water emulsion | 10 | 99.3 | 83 | NO | [S4] |
| PVDF | Oil-in-water emulsion | 1.9 | 90 | 59 | NO | [S4] |
| Poly(vinyl alcohol) (PVA) membrane | Oil-in-water emulsion | 425 | 94.5 | 95 | NO | [S5] |
| PSf/SiO2 membranes | Oil-in-water emulsion | 7 | 98.38 | 34.01 | No | [S6] |


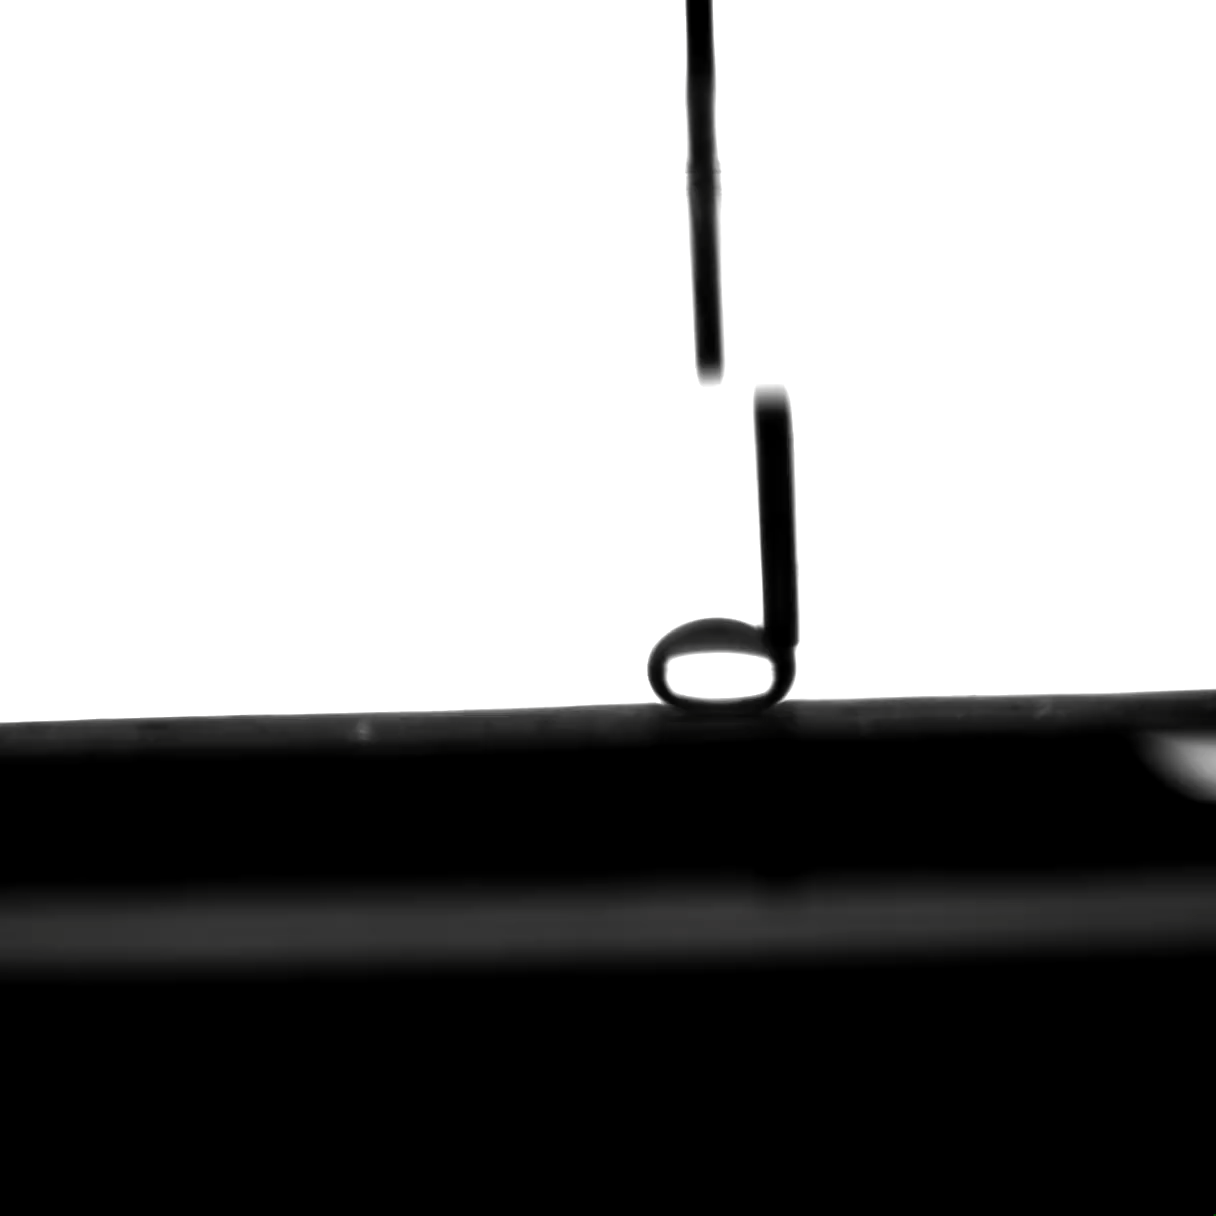


**Video S1 | Oil-repellence and antifouling behavior of SRC-M.** The oil repellence of the SRC-M membrane was evaluated by immersing the membrane underwater and introducing a ∼5 µL oil droplet (chloroform) onto its surface. The interaction between the oil droplet and the membrane was recorded to assess the underwater oil-repellent and antifouling characteristics of SRC-3-M.

**References**

[S1] X. Zhu, W. Tu, K. H. Wee, R. Bai, *J Memb Sci* **2014**, *466*, 36–44.

[S2] B. Chakrabarty, A. K. Ghoshal, M. K. Purkait, *J Memb Sci* **2008**, *325*, 427–437.

[S3] Z. Liu, W. Wu, Y. Liu, C. Qin, M. Meng, Y. Jiang, J. Qiu, J. Peng, *Sep Purif Technol* **2018**, *199*, 37–46.

[S4] M. Mansha, B. Salhi, S. Ali, S. A. Khan, N. Baig, *J Environ Chem Eng* **2022**, *10*, 107935.

[S5] C. Wu, A. Li, L. Li, L. Zhang, H. Wang, X. Qi, Q. Zhang, *Desalination* **2008**, *225*, 312–321.

[S6] A. L. Ahmad, M. A. Majid, B. S. Ooi, *Desalination* **2011**, *268*, 266–269.
